# Supplementary material
Source: PubMed Central journal article supplement (PMC4481136)
Supplement: NIHMS698054-supplement-Supplemental_Information.pdf [file NIHMS698054-supplement-Supplemental_Information.pdf]

## Supplementary Appendix

This appendix has been provided by the authors to give readers additional information about their work.

Supplement to: Le DT, Uram JN, Wang H, et al. PD-1 blockade in tumors with mismatch-repair deficiency. *N Engl J Med*. DOI: 10.1056/NEJMoa1500596

**Supplementary Appendix**

**Table of Contents to the Supplementary Appendix**

|             |                                                                                                                                                      |           |
|-------------|------------------------------------------------------------------------------------------------------------------------------------------------------|-----------|
| <b>I.</b>   | <b>LIST OF INVESTIGATORS.....</b>                                                                                                                    | <b>2</b>  |
| <b>II.</b>  | <b>SUPPLEMENTARY METHODS.....</b>                                                                                                                    | <b>3</b>  |
| <b>III.</b> | <b>SUPPLEMENTARY FIGURES.....</b>                                                                                                                    | <b>9</b>  |
|             | Figure S1. Overview of Study Design .....                                                                                                            | 10        |
|             | Figure S2. Spider plot of radiographic response .....                                                                                                | 11        |
|             | Figure S3. MMR-proficient and deficient CRCs have comparable time on treatment<br>and duration of metastatic disease prior to study enrollment ..... | 12        |
|             | Figure S4. Waterfall plot of biochemical response .....                                                                                              | 13        |
|             | Figure S5. Somatic mutations in MMR-deficient and proficient tumors.....                                                                             | 14        |
|             | Figure S6. Immunohistochemistry of CD8 and PD-L1 Expression .....                                                                                    | 15        |
|             | Figure S7. CD8 and PD-L1 Expression in the MMR-deficient and MMR-proficient<br>tumor microenvironment .....                                          | 16        |
|             | Figure S8. CD8 expression and clinical benefit to pembrolizumab .....                                                                                | 17        |
| <b>IV.</b>  | <b>SUPPLEMENTARY TABLES .....</b>                                                                                                                    | <b>18</b> |
|             | Table S1. Comparison of immune-related and RECIST response criteria.....                                                                             | 19        |
|             | Table S2. Immune-Related response to treatment .....                                                                                                 | 20        |
|             | Table S3. Summary of genomic and IHC data .....                                                                                                      | 21        |
|             | Table S4. Correlation of total somatic mutations and mutation associated<br>neoantigens (MANA) with clinical outcomes.....                           | 22        |
|             | Table S5. Correlation of immune markers with clinical outcome .....                                                                                  | 23        |
| <b>V.</b>   | <b>REFERENCES.....</b>                                                                                                                               | <b>24</b> |

**I. LIST OF INVESTIGATORS**

Dung T. Le  
Jennifer N. Uram  
Hao Wang  
Bjarne R. Bartlett  
Holly Kemberling  
Aleksandra D. Eyring  
Andrew D. Skora  
Brandon S. Lubber  
Nilofer S. Azad  
Dan Laheru  
Barbara Biedrzycki  
Ross C. Donehower  
Atif Zaheer  
George A. Fisher  
Todd S. Crocenzi  
James J. Lee  
Steven M. Duffy  
Richard M. Goldberg  
Albert de la Chapelle  
Minoru R. Koshiji  
Feriyl Bhajjee  
Thomas Huebner  
Ralph H. Hruban  
Laura D. Wood  
Nathan Cuka  
Drew Pardoll  
Nickolas Papadopoulos  
Kenneth W. Kinzler  
Shibin Zhou  
Toby C. Cornish  
Janis M. Taube  
Robert A. Anders  
James R. Eshleman  
Bert Vogelstein  
Luis A. Diaz, Jr

## II. SUPPLEMENTARY METHODS

### PATIENTS

To be eligible for participation in this study, patients had to be at least 18 years of age, have histologically confirmed evidence of previously-treated, progressive carcinoma. All patients underwent MMR status testing prior to enrollment. All patients had at least one measurable lesion as defined by the Response Evaluation Criteria in Solid Tumors (RECIST), version 1.1, an Eastern Cooperative Oncology Group (ECOG) performance-status score of 0 or 1, and adequate hematologic, hepatic, and renal function. Eligible patients with CRC must have received at least 2 prior cancer therapies and patients with other cancer types must have received at least 1 prior cancer therapy. Patients with untreated brain metastases, history of HIV, hepatitis B, hepatitis C, clinically significant ascites/effusions, or autoimmune disease were excluded.

### STUDY OVERSIGHT

Initial drafts of the manuscript were prepared by a subset of the authors and all authors contributed to the final manuscript. All the authors made the decision to submit the manuscript for publication. The principal investigator and study sponsor vouch for the accuracy and completeness of the data reported as well as adherence to the protocol.

### HLA TYPING

HLA-A, HLA-B and HLA-C Sequence Based Typing can be divided into three distinct steps, as described below. A generic, A\*02 specific, B generic, B group specific, C generic and C\*07 specific PCR and sequencing mixes were made in the JHU core facility. Celera's AlleleSEQR HLA-B Sequence Based Typing kit was used for B generic SBT. The HLA-A typing scheme is composed of two PCR reactions, A generic and A\*02 specific. A generic amplicon encompasses partial exon 1- partial exon 5. A\*02 amplicon encompasses partial intron 1 - partial exon 5. HLA-B typing scheme is composed of two PCR reactions, B generic and B group specific. The B generic PCR is a multiplexed reaction containing two PCR amplicons encompassing exon 2 – exon 3 and exon 4 – exon 7. B group specific amplicon encompasses partial intron 1 - partial exon 5. HLA-C typing scheme is composed of two PCR reactions, C generic and C\*07 specific. C generic and C\*07 specific amplicons encompasses exons 1 - 7.

The specificity of the HLA-A and B PCR employed AmpliTaq Gold DNA polymerase. The GeneAmp High Fidelity enzyme is used for the HLA-C and C\*07 PCR mixes. This enzyme is a mix of two polymerases: AmpliTaq DNA polymerase (non-proofreading polymerase) and a proofreading polymerase. This enzyme mix is necessary to produce efficient and robust amplification of the larger full length HLA-C amplicon.

PCR product purification was performed using Exonuclease I and Shrimp Alkaline Phosphatase. The A generic and B generic amplicons were bi-directionally sequenced for exons 2,3,4. The C generic amplicon was bi-directionally sequenced for exons 2,3 and sequenced in a single direction for exons 1,4,5,6,7. A\*02 specific, B group specific and C\*07 specific amplicons were sequenced in a single direction for exons 2,3. All sequencing reactions were performed with Big Dye Terminator V1.1 from Applied Biosystems and sequenced with an ABI Prism 3500XL Genetic Analyzer. Conexio Genomic's "Assign SBT" allele assignment software was used to process the data files.

## **MISMATCH REPAIR STATUS TESTING<sup>1,2</sup>**

Six slides of tumor and normal (uninvolved lymph node or margin of resection) were cut (5 microns each), deparaffinized (xylene), and one stained with hematoxylin and eosin (H+E). A tumor area containing at least 20% neoplastic cells, designated by a board-certified Anatomic Pathologist was macrodissected using the Pinpoint DNA isolation system (Zymo Research, Irvine, CA), digested in proteinase K for 8 hours and DNA was isolated using a QIAamp DNA Mini Kit (Qiagen, Valencia, CA). MSI was assessed using the MSI Analysis System (Promega, Madison, WI), composed of 5 pseudomonomorphic mononucleotide repeats (BAT-25, BAT-26, NR-21, NR-24 and MONO-27) to detect MSI and 2-pentanucleotide repeat loci (PentaC and PentaD) to confirm identity between normal and tumor samples, per manufacturer's instructions. Following amplification of 50-100 ng DNA, the fluorescent PCR products were sized on an Applied Biosystems 3130xl capillary electrophoresis instrument (Invitrogen, Calsbad, CA). Pentanucleotide loci confirmed identity in all cases. Controls included water as a negative control and a mixture of 80% germline DNA with 20% MSI cancer DNA as a positive control. The size in bases was determined for each microsatellite locus and tumors were designated as MSI if two or more mononucleotide loci varied in length compared to the germline DNA.

## **SEQUENCING ANALYSIS**

### **Samples**

Samples provided as FFPE blocks or frozen tissue underwent pathological review to determine tumor cellularity. Tumors were macrodissected to remove contaminating normal tissue, resulting in samples containing >20% neoplastic cells. Matched normal samples were provided as blood, saliva or normal tissue obtained from surgery.

### **Sample Preparation and Next-Generation Sequencing<sup>3</sup>**

Sample preparation, library construction, exome capture, next generation sequencing, and bioinformatics analyses of tumor and normal samples were performed at Personal Genome Diagnostics, Inc. (Baltimore, Maryland). In brief, DNA was extracted from frozen or formalin-fixed paraffin embedded (FFPE) tissue, along with matched blood or saliva samples using the Qiagen DNA FFPE tissue kit or Qiagen DNA blood mini kit (Qiagen, CA). Genomic DNA from tumor and normal samples were fragmented and used for Illumina TruSeq library construction (Illumina, San Diego, CA) according to the manufacturer's instructions or as previously

described<sup>4</sup>. Briefly, 50 nanograms (ng) - 3 micrograms ( $\mu$ g) of genomic DNA in 100 microliters ( $\mu$ l) of TE was fragmented in a Covaris sonicator (Covaris, Woburn, MA) to a size of 150-450bp. To remove fragments smaller than 150bp, DNA was purified using Agencourt AMPure XP beads (Beckman Coulter, IN) in a ratio of 1.0 to 0.9 of PCR product to beads twice and washed using 70% ethanol per the manufacturer's instructions. Purified, fragmented DNA was mixed with 36  $\mu$ l of H<sub>2</sub>O, 10  $\mu$ l of End Repair Reaction Buffer, 5  $\mu$ l of End Repair Enzyme Mix (cat# E6050, NEB, Ipswich, MA). The 100  $\mu$ l end-repair mixture was incubated at 20°C for 30 min, and purified using Agencourt AMPure XP beads (Beckman Coulter, IN) in a ratio of 1.0 to 1.25 of PCR product to beads and washed using 70% ethanol per the manufacturer's instructions. To A-tail, 42  $\mu$ l of end-repaired DNA was mixed with 5  $\mu$ l of 10X dA Tailing Reaction Buffer and 3  $\mu$ l of Klenow (exo-)(cat# E6053, NEB, Ipswich, MA). The 50  $\mu$ l mixture was incubated at 37°C for 30 min and purified using Agencourt AMPure XP beads (Beckman Coulter, IN) in a ratio of 1.0 to 1.0 of PCR product to beads and washed using 70% ethanol per the manufacturer's instructions. For adaptor ligation, 25  $\mu$ l of A-tailed DNA was mixed with 6.7  $\mu$ l of H<sub>2</sub>O, 3.3  $\mu$ l of PE-adaptor (Illumina), 10  $\mu$ l of 5X Ligation buffer and 5  $\mu$ l of Quick T4 DNA ligase (cat# E6056, NEB, Ipswich, MA). The ligation mixture was incubated at 20°C for 15 min and purified using Agencourt AMPure XP beads (Beckman Coulter, IN) in a ratio of 1.0 to 0.95 and 1.0 of PCR product to beads twice and washed using 70% ethanol per the manufacturer's instructions. To obtain an amplified library, twelve PCRs of 25  $\mu$ l each were set up, each including 15.5  $\mu$ l of H<sub>2</sub>O, 5  $\mu$ l of 5 x Phusion HF buffer, 0.5  $\mu$ l of a dNTP mix containing 10 mM of each dNTP, 1.25  $\mu$ l of DMSO, 0.25  $\mu$ l of Illumina PE primer #1, 0.25  $\mu$ l of Illumina PE primer #2, 0.25  $\mu$ l of Hotstart Phusion polymerase, and 2  $\mu$ l of the DNA. The PCR program used was: 98°C for 2 minutes; 12 cycles of 98°C for 15 seconds, 65°C for 30 seconds, 72°C for 30 seconds; and 72°C for 5 min. DNA was purified using Agencourt AMPure XP beads (Beckman Coulter, IN) in a ratio of 1.0 to 1.0 of PCR product to beads and washed using 70% ethanol per the manufacturer's instructions. Exonic or targeted regions were captured in solution using the Agilent SureSelect v.4 kit according to the manufacturer's instructions (Agilent, Santa Clara, CA). The captured library was then purified with a Qiagen MinElute column purification kit and eluted in 17  $\mu$ l of 70°C EB to obtain 15  $\mu$ l of captured DNA library. (5) The captured DNA library was amplified in the following way: Eight 30 $\mu$ l PCR reactions each containing 19  $\mu$ l of H<sub>2</sub>O, 6  $\mu$ l of 5 x Phusion HF buffer, 0.6  $\mu$ l of 10 mM dNTP, 1.5  $\mu$ l of DMSO, 0.30  $\mu$ l of Illumina PE primer #1, 0.30 $\mu$ l of Illumina PE primer #2, 0.30  $\mu$ l of Hotstart Phusion polymerase, and 2  $\mu$ l of captured exome library were set up. The PCR program used was: 98°C for 30 seconds; 14 cycles (exome) or 16 cycles (targeted) of 98°C for 10 seconds, 65°C for 30 seconds, 72°C for 30 seconds; and 72°C for 5 min. To purify PCR products, a NucleoSpin Extract II purification kit (Macherey-Nagel, PA) was used following the manufacturer's instructions. Paired-end sequencing, resulting in 100 bases from each end of the fragments for exome libraries and 150 bases from each end of the fragment for targeted libraries, was performed using Illumina HiSeq 2000/2500 and Illumina MiSeq instrumentation (Illumina, San Diego, CA).

### **Primary Processing of Next-Generation Sequencing Data and Identification of Putative Somatic Mutations<sup>3</sup>**

Somatic mutations were identified using VariantDx custom software (Personal Genome Diagnostics, Baltimore, Maryland) for identifying mutations in matched tumor and normal

samples. Prior to mutation calling, primary processing of sequence data for both tumor and normal samples were performed using Illumina CASAVA software (v1.8), including masking of adapter sequences. Sequence reads were aligned against the human reference genome (version hg18) using ELAND with additional realignment of select regions using the Needleman-Wunsch method<sup>5</sup>. Candidate somatic mutations, consisting of point mutations, insertions, and deletions were then identified using VariantDx across the either the whole exome or regions of interest. VariantDx examines sequence alignments of tumor samples against a matched normal while applying filters to exclude alignment and sequencing artifacts. In brief, an alignment filter was applied to exclude quality failed reads, unpaired reads, and poorly mapped reads in the tumor. A base quality filter was applied to limit inclusion of bases with reported phred quality score > 30 for the tumor and > 20 for the normal. A mutation in the tumor was identified as a candidate somatic mutation only when (i) distinct paired reads contained the mutation in the tumor; (ii) the number of distinct paired reads containing a particular mutation in the tumor was at least 10% of read pairs; (iii) the mismatched base was not present in >1% of the reads in the matched normal sample as well as not present in a custom database of common germline variants derived from dbSNP; and (iv) the position was covered in both the tumor and normal at > 150X. Mutations arising from misplaced genome alignments, including paralogous sequences, were identified and excluded by searching the reference genome.

Candidate somatic mutations were further filtered based on gene annotation to identify those occurring in protein-coding regions. Functional consequences were predicted using snpEff and a custom database of CCDS, RefSeq and Ensembl annotations using the latest transcript versions available on hg18 from UCSC (<https://genome.ucsc.edu/>). Predictions were ordered to prefer transcripts with canonical start and stop codons and CCDS or Refseq transcripts over Ensembl when available. Finally mutations were filtered to exclude intronic and silent changes, while retaining mutations resulting in missense mutations, nonsense mutations, frameshifts, or splice site alterations. A manual visual inspection step was used to further remove artifactual changes.

### **MUTANT PEPTIDE MHC BINDING PREDICTION**

Somatic frameshift, insertions, deletions, and missense mutations predicted to result in an amino acid change were analyzed for potential MHC class I binding based on the individual patient's HLA haplotype. Our initial analysis focused on HLA-A and HLA-B. Amino acid mutations were linked to their corresponding CCDS accession number and in instances where this was unavailable, either a Refseq or ensemble transcript was used to extract the protein sequence. To identify 8mer, 9mer, and 10mer epitopes, amino acid fragments surrounding each mutation were identified. These 15, 17, and 19 mutant amino acid fragments were analyzed by the epitope prediction program NetMHC 3.4.<sup>6</sup> Epitopes with a predicted affinity of <50nm were considered to be strong potential binders and epitopes with a predicted affinity of <500nm were considered to be weak potential binders as suggested by the NetMHC group<sup>6</sup>.

To further refine the total neoantigen burden, we repeated that same process for the complementary wild-type peptide for each mutant peptide. We then filtered for mutant peptides that were strong potential binders when the complementary wild-type peptide was predicted a

weak potential binder. These mutant peptides are referred to as mutation-associated neoantigens (MANA). In the event that a patient had a (e.g., cases 1, 17 and 21) single MHC haplotype not supported by NetMHC 3.4, the individual haplotype was not included in our analysis.

## STATISTICAL METHODS

### **Design of the trial**

This trial was conducted using a parallel two-stage design to simultaneously evaluate the efficacy of MK-3475 and MSI as a treatment selection marker for anti-PD-1 therapy. It consisted of two-stage phase 2 studies in parallel in the three cohorts of patients described in the text. The study agent, MK-3475, was administered at 10 mg/kg intravenously every 14 days.

For each of Cohort A and B, the co-primary endpoints were progression-free-survival (irPFS) at 20 weeks and objective response (irOR) assessed using immune related criteria. A step-down gatekeeping procedure was used to preserve the overall type I error. A two-stage Green-Dahlberg design was used to evaluate irPFS, with interim and final analysis after 15 and 25 patients, respectively. At stage 1,  $\geq 1$  of 15 free-of-progression at 20 weeks were required to proceed to the second stage, and  $\geq 4$  of 25 free-of-progression at 20 weeks were then required to proceed to test for irOR, with  $\geq 4$  of 25 responders (irCR or irPR) indicating promising efficacy in that cohort. Each cohort could be terminated for efficacy as soon as  $\geq 4$  free-of-progression at 20 weeks and  $\geq 4$  responses were confirmed, or be terminated for futility as soon as 0 of 15 in stage 1 were free-of-progression at 20 weeks or  $\geq 22$  subjects had disease progression by 20 weeks. This design achieves 90% power to detect a 20-week irPFS rate of 25% and 80% power to detect an irOR rate (irORR) of 21%, with an overall type I error of 0.05 at the null hypothesis of 20-week irPFS rate of 5% and irORR of 5%.

For Cohort C, the primary endpoint was irPFS at 20 weeks. A two-stage Green-Dahlberg two-stage design was used, with an interim and final analysis after 14 and 21 patients; at stage 1,  $\geq 1$  of 14 free-of-progression at 20 weeks were required to proceed to the second stage, with  $\geq 4$  of 21 free-of-progression at 20 weeks at the end indicating adequate efficacy in Cohort C. The cohort could be terminated as soon as  $\geq 4$  free-of-progression at 20 weeks were confirmed. The design has 81% power to detect a 20-week irPFS rate of 25% with a 5% type I error at the null hypothesis of 20-week irPFS rate of 5%.

### **Statistical analysis**

Response and progression were evaluated using RECIST v1.1 and the immune-related response criteria (irRC) adopted from Wolchok et al.<sup>8</sup>, which uses the sum of the products of bidimensional tumor measurements and incorporates new lesions into the sum. Progression-free survival (PFS) rates and irPFS rate at 20-weeks was estimated as the proportion of patients who were free-of-disease progression and alive at 20 weeks after the initiation of pembrolizumab. Patients who had disease progression prior to 20 weeks or were enrolled for >20 weeks at the time the study data were collated were included in the analysis for estimating 20-week PFS (irPFS) rate. Patients who dropped out early due to toxicities or worsening



disease and therefore did not have 20-week tumor assessment were considered as having progressive disease. ORR (irORR) was the proportion of patients who achieved best overall response of CR or PR (irCR or irPR). Patients who were in the study long enough to have tumor response evaluations were included in the analysis for estimating response rates. Among those who responded (CR or PR), duration of response was the time of first RECIST response to the time of disease progression, and was censored at the last evaluable tumor assessment for responders who had not progressed.

PFS and irPFS were defined as the time from the date of initial dose to the date of disease progression or the date of death due to any cause, whichever occurred first. PFS and irPFS were censored on the date of the last evaluable tumor assessment documenting absence of progressive disease for patients who were alive and progression-free. Overall survival (OS) was defined as the time from the date of initial dose to death due to any cause. For patients who were still alive at the time of analysis, the OS time was censored on the last date the patients were known to be alive. Survival times were summarized by the Kaplan-Meier method. As a *post hoc* analysis, log-rank tests were used to compare Cohort A and B and hazard ratios were estimated based on Cox models.

The association of percent CEA decline after 1 cycle with PFS or OS was assessed using landmark analysis based on Cox regression models. For correlative studies, non-parametric Wilcoxon test was used to compare mutational load between MMR-deficient and MMR-proficient patients. The effects of baseline mutational burden and immune markers on response and survival times were examined using logistic regression and Cox regression, respectively.

## **IMMUNOHISTOCHEMISTRY & IMAGE ANALYSIS**

The fraction of malignant cells exhibiting a membranous pattern of B7-H1 expression and the percentage at the invasive front were quantified by three pathologists (R.A.A., F.B., and J.M.T.) as previously reported<sup>9,10</sup>. Image analysis was used to determine the number of CD8 diaminobenzidine (DAB)-stained cells. Using the H&E-stained slide for each case, we identified the following regions: i) tumor, ii) invasive front (the boundary between malignant and non-malignant tissue), and iii) normal tissue. The CD8-stained slides were scanned at 20x equivalent magnification (0.49 micrometers per pixel) on an Aperio ScanScope AT. Regions corresponding to tumor, invasive front and normal tissue (above, from the H&E) were annotated on separate layers using Aperio ImageScope v12.1.0.5029.

CD8-positive lymphocyte density was calculated in each of the above regions using a custom algorithm implemented in PIP<sup>11</sup>. Results were converted to Deepzoom images using the VIPS library<sup>12</sup> and visualized using the OpenSeadragon viewer (<http://openseadragon.github.io>).

**III. SUPPLEMENTARY FIGURES**

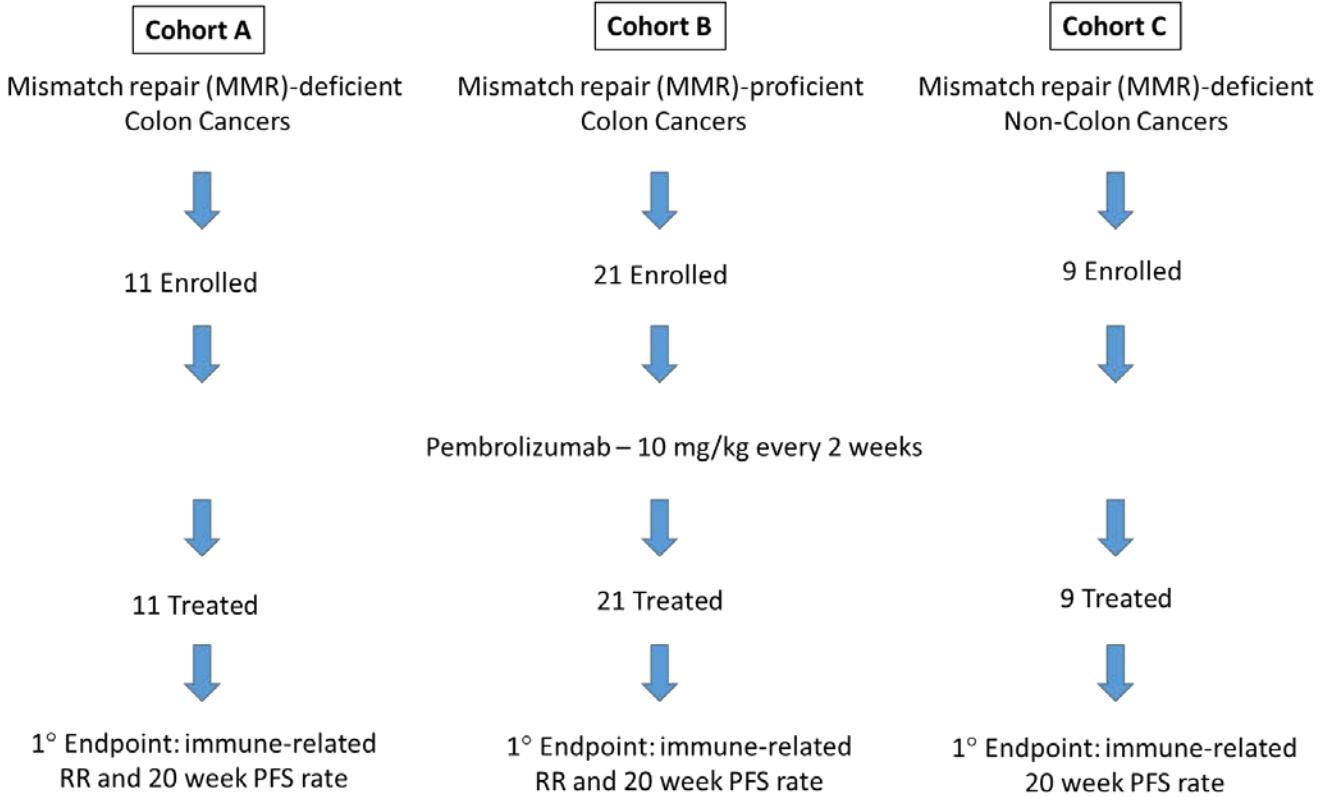

**Figure S1. Overview of Study Design.** MMR-deficiency, immune-related progression-free survival (PFS), response rate (RR). The patients who were in the study long enough to have tumor response evaluations were included in the analysis for estimating irORR (n=10, 18, and 7 in Cohort A, B, and C, respectively). The patients who were enrolled for >20 weeks at the time the study data were collated were included in the analysis for estimating 20 week irPFS rate (n=9, 18, and 6 in Cohort A, B, and C, respectively). All treated patients were included in the survival analysis of PFS and OS.

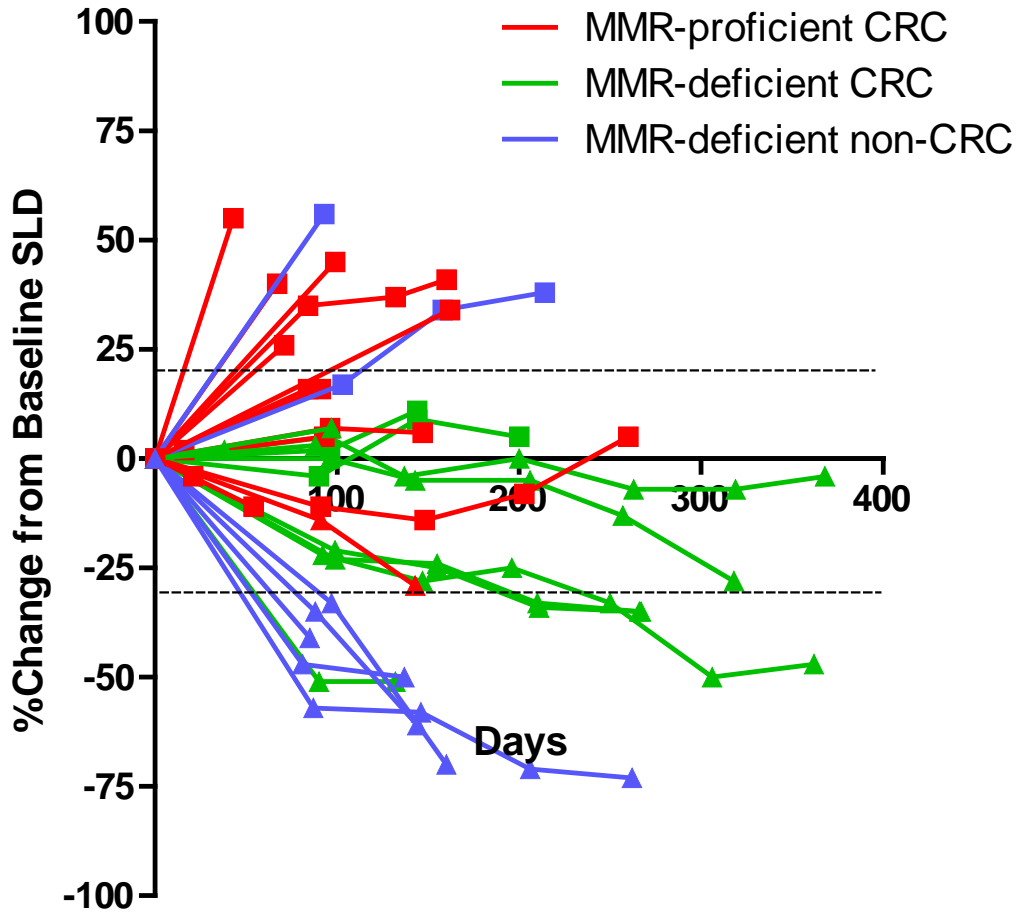

**Figure S2. Spider plot of radiographic response.** Tumor responses were measured at regular intervals and values show percent change of the sum of longest diameters (SLD) from the baseline measurements of each measurable tumor. Patients were only included if baseline and on study treatment scans were available. Green and red represent patients with MMR-deficient and proficient CRCs, respectively. Blue represents patients with MMR-deficient cancers other than CRC.

**A. Time on therapy prior to enrollment on current study**

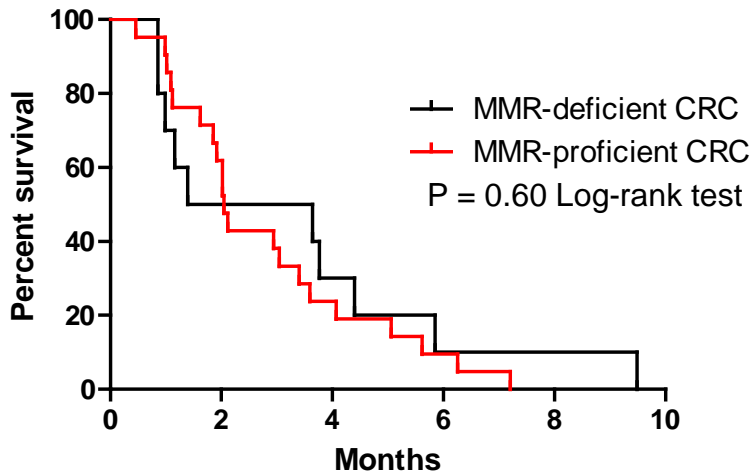

**B. Duration of the diagnosis of metastatic diagnosis prior to enrollment of pembrolizumab**

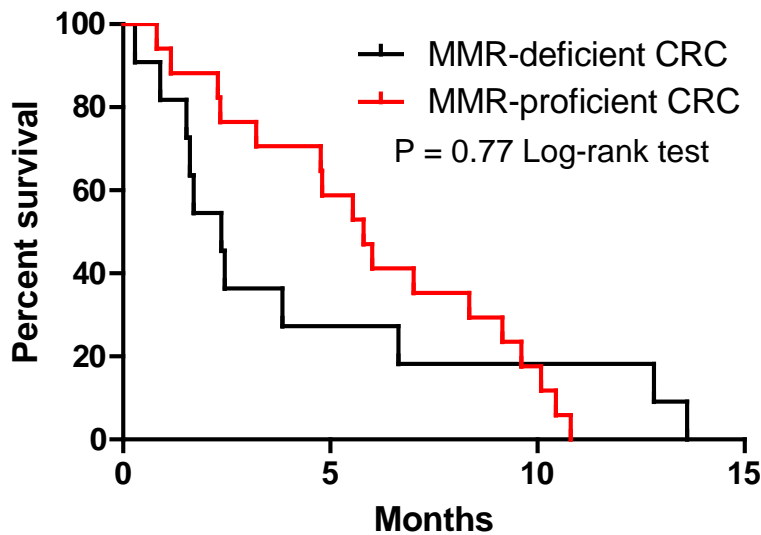

**Figure S3. MMR-proficient and deficient CRCs have comparable time on treatment and duration of metastatic disease prior to study enrollment.** Kaplan-Meier estimates of (A) time on therapy immediately prior to study enrollment (HR 0.81, 95% CI 0.38 to 1.752,  $p=0.60$ ) and (B) duration of metastatic disease prior to enrollment (HR 1.13, 95% CI 0.49 to 2.62,  $p=0.78$ ) on this pembrolizumab study were comparable between the MMR-deficient and proficient CRC cohorts. The short duration on prior therapy is expected in a treatment refractory CRC population.



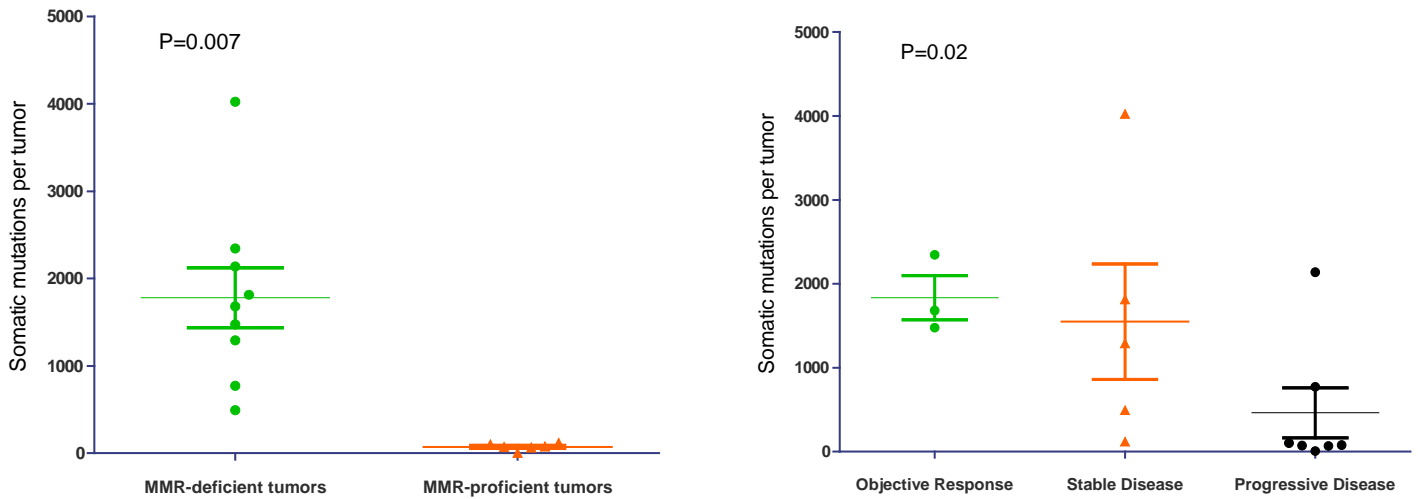

**Figure S5. Somatic mutations in MMR-deficient and proficient tumors.** Total somatic mutations per tumor identified by exome sequencing of tumor and matched normal DNA (left) and correlation with objective responses (right) (non-parametric Wilcoxon test,  $p=0.007$  and Jonckheere-Terpstra test for trend,  $p=0.02$ ).

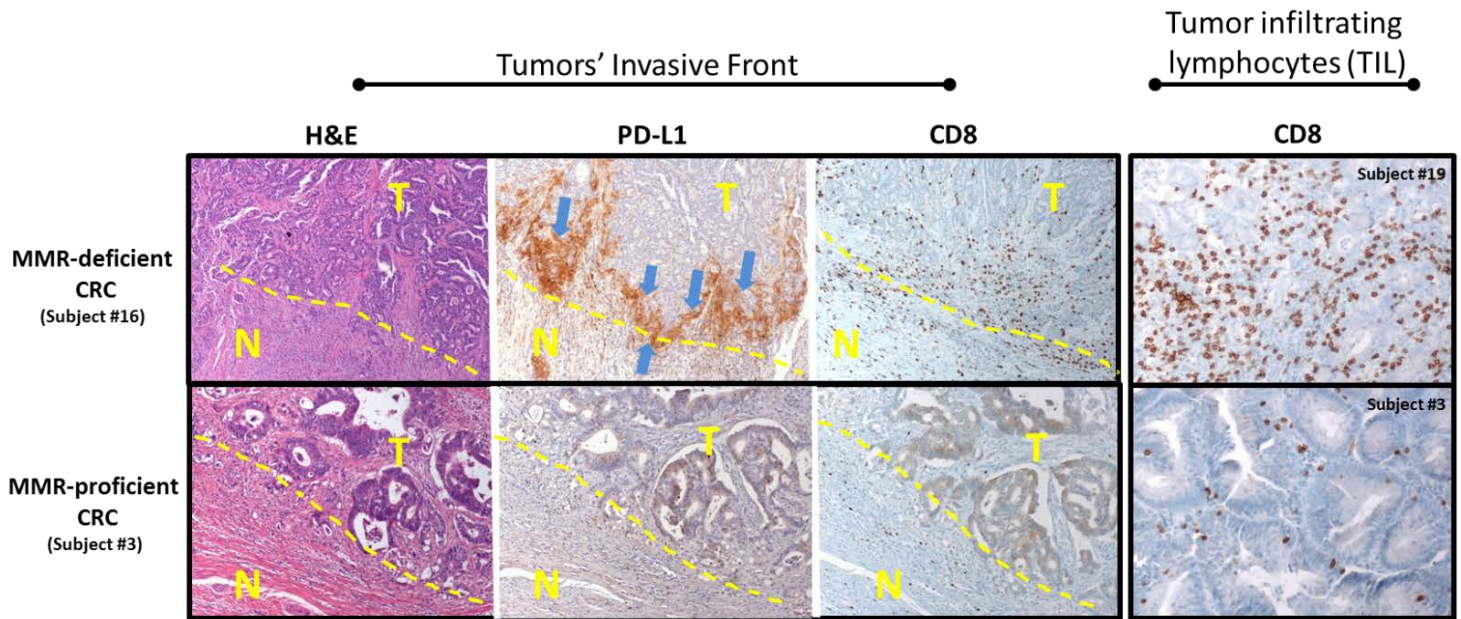

**Figure S6. Immunohistochemistry of CD8 and PD-L1 Expression.** The invasive front (yellow dashed line) from a MMR-deficient CRC (subject #16, top) and MMR-proficient CRC (subject #3, bottom). The yellow dashed line separates tumor (T) and normal (N) tissue. There is marked expression of PD-L1 (blue arrows) and CD8 (brown dots) in the MMR-deficient tumor (top panels) patient while there is very little expression of either marker in the MMR-proficient tumor (bottom panels). Representative images of tumor infiltrating lymphocytes (TIL) in another MMR-deficient CRC (subject #19, top) and MMR-proficient CRC (subject #3, bottom) immunolabeled with an antibody to CD8 (brown dots). Note the infiltration of CD8 cells in the MMR-deficient tumor. Invasive front original magnification 10x and TIL 20x.



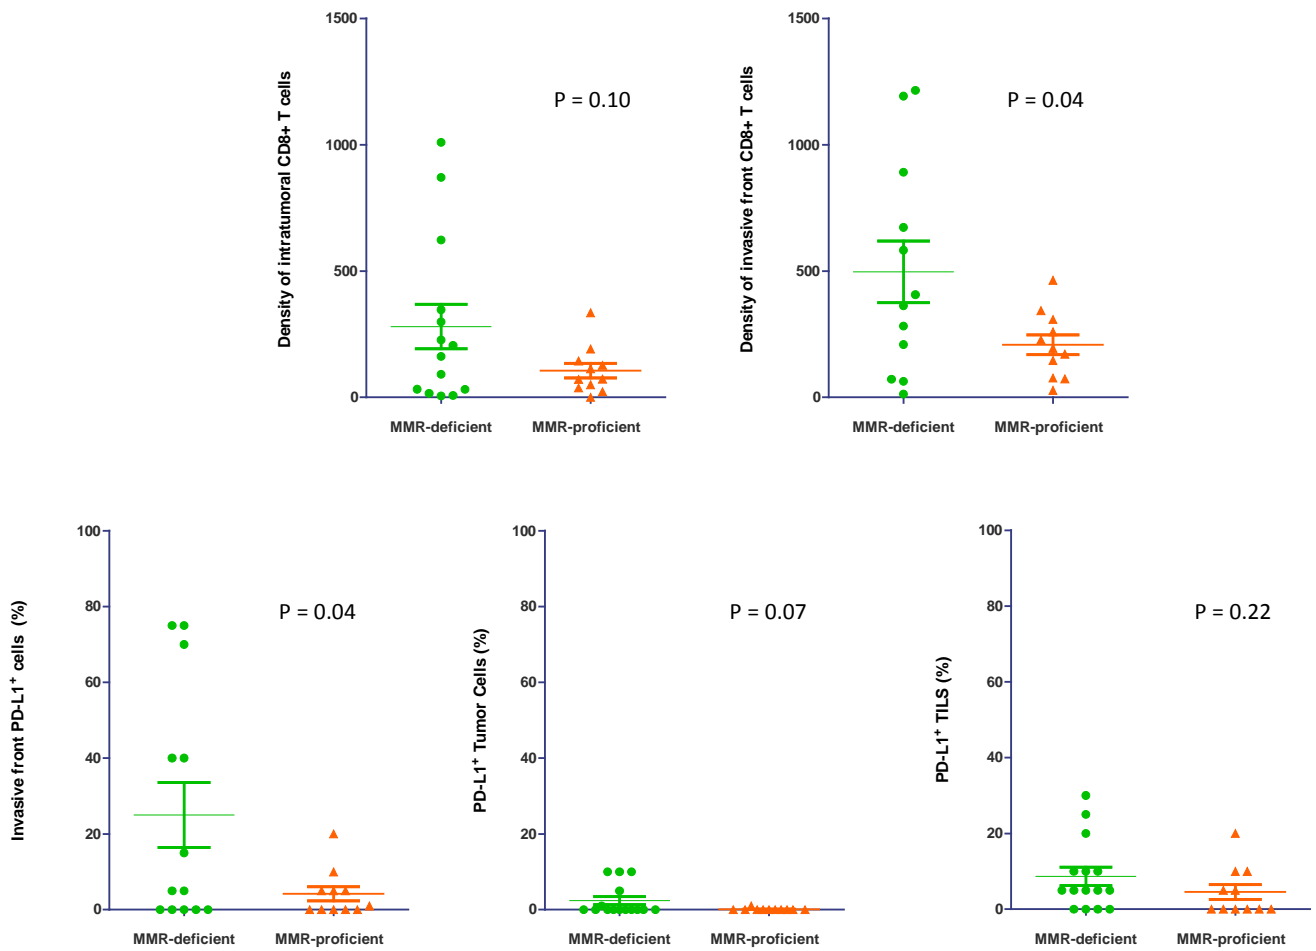

**Figure S7. CD8 and PD-L1 Expression in the MMR-deficient and MMR-proficient tumor microenvironment.** T cell density units are cells/mm<sup>2</sup> of tumor. Invasive front refers to the immune cells (TILs and macrophages) at the junction of the tumor and normal tissue. P-values obtained using an unpaired t-test.

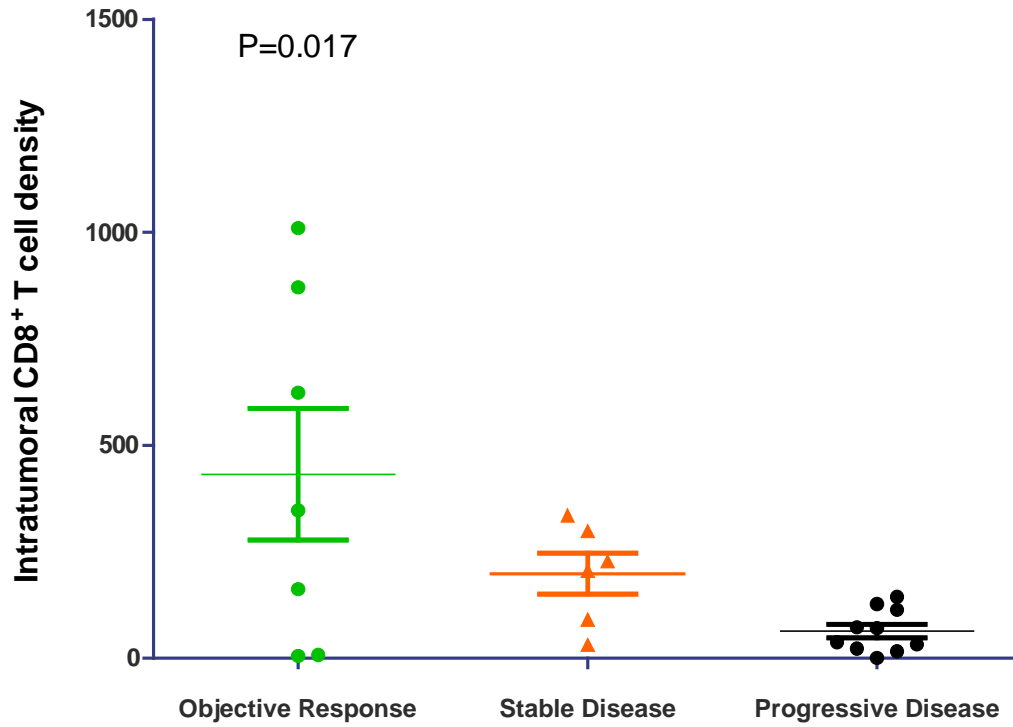

**Figure S8. CD8 expression and clinical benefit to pembrolizumab.** Correlation between the intratumoral CD8<sup>+</sup> T cell density (cells/mm<sup>2</sup>) and objective response (Jonckheere-Terpstra test for trend,  $p=0.02$ ).

**IV. SUPPLEMENTARY TABLES**

**Table S1. Comparison of immune-related and RECIST response criteria**  
(adapted from Wolchok et al. Clin can res 2009;15:7412-20.)

|                   | <b>CR</b>        | <b>PR</b>                                                                          | <b>SD</b>                                                                         | <b>PD</b>                                                                               |
|-------------------|------------------|------------------------------------------------------------------------------------|-----------------------------------------------------------------------------------|-----------------------------------------------------------------------------------------|
| <b>RECIST 1.1</b> | All lesions gone | ≥ 30% decrease in sum of target lesion diameters from baseline                     | Neither CR, PR, or PD from nadir                                                  | ≥ 20% increase in sum of target lesion diameters from nadir<br>Appearance of new lesion |
|                   | <b>irCR</b>      | <b>irPR</b>                                                                        | <b>irSD</b>                                                                       | <b>irPD</b>                                                                             |
| <b>irRC</b>       | All lesions gone | SPD of index + any new lesions decreases ≥50% from baseline<br>New lesions allowed | SPD of index + any new lesions neither irCR, irPR, or irPD<br>New lesions allowed | SPD of index + any new lesions increases ≥ 25% from nadir<br>irPD is based on SPD only  |

RECIST 1.1= Response Evaluation Criteria in Solid Tumors 1.1; irRC= Immune Related Response Criteria

CR= complete response; PR= partial response; SD= stable disease; PD= progressive disease; SPD= sum of the product of the perpendicular diameters

**Table S2. Immune-Related response to treatment**

| <i>Type of immune-related responses-no (%)</i>             | <b>MMR-deficient<br/>CRC<br/>n=10</b> | <b>MMR-proficient<br/>CRC<br/>n=18</b> | <b>MMR-deficient<br/>non-CRC<br/>n=7</b> |
|------------------------------------------------------------|---------------------------------------|----------------------------------------|------------------------------------------|
| <b>Complete Response</b>                                   | 0 (0)                                 | 0 (0)                                  | 1 (14) <sup>1</sup>                      |
| <b>Partial Response</b>                                    | 4 (40)                                | 0 (0)                                  | 4 (57) <sup>2</sup>                      |
| <b>Stable Disease (Week 12)</b>                            | 5 (50)                                | 2 (11)                                 | 0 (0)                                    |
| <b>Progressive Disease</b>                                 | 1 (10)                                | 11 (61)                                | 2 (29)                                   |
| <b>Not Evaluable<sup>3</sup></b>                           | 0 (0)                                 | 5 (28)                                 | 0 (0)                                    |
| <b>Immune-related objective response rate (%)</b>          | 40                                    | 0                                      | 71                                       |
| <b>95% CI</b>                                              | 12-74                                 | 0-19                                   | 29-96                                    |
| <b>Immune-related disease control rate (%)<sup>4</sup></b> | 90                                    | 11                                     | 71                                       |
| <b>95% CI</b>                                              | 55-100                                | 1-35                                   | 29-96                                    |
| <b>Immune-related PFS at 20 weeks (%)</b>                  | 78                                    | 11                                     | 67                                       |
| <b>95% CI</b>                                              | 40-97                                 | 1-35                                   | 22-96                                    |

<sup>1</sup> Originally PR at 12 that was converted to CR at 20 weeks

<sup>2</sup> One PR at 12 weeks

<sup>3</sup> Patients were considered not evaluable if they did not undergo a 12 week scan due to clinical progression.

<sup>4</sup> The rate of disease control was defined as the percentage of patients who had a complete response, partial response or stable disease for 12 weeks or more.

**Table S3. Summary of genomic and IHC data**

See attached spreadsheet

**Table S4. Correlation of total somatic mutations and mutation associated neoantigens (MANA) with clinical outcomes**

**Trend test to compare CR/PR vs. SD vs. PD**

| <b>Variable</b>                         | <b>P value</b> |
|-----------------------------------------|----------------|
| Total Somatic Mutations                 | 0.024          |
| Mutation-associated neoantigens (MANAs) | 0.028          |

**Association of mutations and MANA with response rates**

| <b>Variable (log scale*)</b>            | <b>Odds Ratio</b> | <b>95% Confidence interval</b> |              | <b>P value</b> |
|-----------------------------------------|-------------------|--------------------------------|--------------|----------------|
|                                         |                   | <b>Lower</b>                   | <b>Upper</b> |                |
| Total Somatic Mutations                 | 3.312             | 0.500                          | 21.924       | 0.214          |
| Mutation-associated neoantigens (MANAs) | 3.087             | 0.617                          | 15.439       | 0.170          |

**Association of mutations and MANA with PFS**

| <b>Variable (log scale*)</b>            | <b>Hazard Ratio</b> | <b>95% Confidence interval</b> |              | <b>P value</b> |
|-----------------------------------------|---------------------|--------------------------------|--------------|----------------|
|                                         |                     | <b>Lower</b>                   | <b>Upper</b> |                |
| Total Somatic Mutations                 | 0.628               | 0.424                          | 0.931        | 0.021          |
| Mutation-associated neoantigens (MANAs) | 0.599               | 0.391                          | 0.916        | 0.018          |

**Association of mutations and MANA with OS**

| <b>Variable (log scale*)</b>            | <b>Hazard Ratio</b> | <b>95% Confidence interval</b> |              | <b>P value</b> |
|-----------------------------------------|---------------------|--------------------------------|--------------|----------------|
|                                         |                     | <b>Lower</b>                   | <b>Upper</b> |                |
| Total Somatic Mutations                 | 0.707               | 0.481                          | 1.038        | 0.077          |
| Mutation-associated neoantigens (MANAs) | 0.676               | 0.453                          | 1.008        | 0.055          |

**Table S5. Correlation of immune markers with clinical outcome**

**Trend test to compare CR/PR vs. SD vs. PD**

| <b>Variable</b>                                                             | <b>P value</b> |
|-----------------------------------------------------------------------------|----------------|
| PD-L1 membranous expression within tumor ( $\geq 5\%$ vs. $< 5\%$ )         | 0.208          |
| PD-L1 expression by TIL and associated macrophages at invasive front (%)    | 0.043          |
| PD-L1 expression by TIL and associated macrophages on TILS within tumor (%) | 0.024          |
| CD8 density (cells/mm <sup>2</sup> ) within tumor                           | 0.017          |
| CD8 density (cells/mm <sup>2</sup> ) at Invasive front                      | 0.768          |
| CD8 density (cells/mm <sup>2</sup> ) in non-tumor tissue                    | 0.346          |

\* except for PD-L1 Expression on Tumor ( $> 5\%$  vs.  $< 5\%$ ), which is represented as a binary variable

**Association of immune markers with response rates**

| <b>Variable (log scale*)</b>                                                | <b>Odds Ratio</b> | <b>95% Confidence interval</b> |              | <b>P value</b> |
|-----------------------------------------------------------------------------|-------------------|--------------------------------|--------------|----------------|
|                                                                             |                   | <b>Lower</b>                   | <b>Upper</b> |                |
| PD-L1 membranous expression within tumor ( $\geq 5\%$ vs. $< 5\%$ )         | 3.200             | 0.354                          | 28.945       | 0.301          |
| PD-L1 expression by TIL and associated macrophages at invasive front (%)    | 1.075             | 0.820                          | 1.411        | 0.600          |
| PD-L1 expression by TIL and associated macrophages on TILS within tumor (%) | 1.139             | 0.862                          | 1.506        | 0.361          |
| CD8 density (cells/mm <sup>2</sup> ) within tumor                           | 1.337             | 0.706                          | 2.531        | 0.372          |
| CD8 density (cells/mm <sup>2</sup> ) at Invasive front                      | 0.515             | 0.193                          | 1.374        | 0.185          |
| CD8 density (cells/mm <sup>2</sup> ) in non-tumor tissue                    | 1.219             | 0.535                          | 2.777        | 0.637          |

\* except for PD-L1 Expression on Tumor ( $> 5\%$  vs.  $< 5\%$ ), which is represented as a binary variable

**Association of immune markers with PFS**

| <b>Variable (log scale*)</b>                                                | <b>Hazard Ratio</b> | <b>95% Confidence interval</b> |              | <b>P value</b> |
|-----------------------------------------------------------------------------|---------------------|--------------------------------|--------------|----------------|
|                                                                             |                     | <b>Lower</b>                   | <b>Upper</b> |                |
| PD-L1 membranous expression within tumor ( $\geq 5\%$ vs. $< 5\%$ )         | 0.196               | 0.025                          | 1.518        | 0.119          |
| PD-L1 expression by TIL and associated macrophages at invasive front (%)    | 0.899               | 0.784                          | 1.031        | 0.126          |
| PD-L1 expression by TIL and associated macrophages on TILS within tumor (%) | 0.888               | 0.765                          | 1.031        | 0.118          |
| CD8 density (cells/mm <sup>2</sup> ) within tumor                           | 0.900               | 0.794                          | 1.020        | 0.100          |
| CD8 density (cells/mm <sup>2</sup> ) at Invasive front                      | 1.017               | 0.607                          | 1.706        | 0.948          |
| CD8 density (cells/mm <sup>2</sup> ) in non-tumor tissue                    | 1.144               | 0.780                          | 1.677        | 0.492          |

\* except for PD-L1 Expression on Tumor ( $> 5\%$  vs.  $< 5\%$ ), which is represented as a binary variable

**Association of immune markers with OS**

| <b>Variable (log scale*)</b>                                                | <b>Hazard Ratio</b> | <b>95% Confidence interval</b> |              | <b>P value</b> |
|-----------------------------------------------------------------------------|---------------------|--------------------------------|--------------|----------------|
|                                                                             |                     | <b>Lower</b>                   | <b>Upper</b> |                |
| PD-L1 membranous expression within tumor ( $\geq 5\%$ vs. $< 5\%$ )         | 0.513               | 0.062                          | 4.232        | 0.535          |
| PD-L1 expression by TIL and associated macrophages at invasive front (%)    | 0.978               | 0.816                          | 1.173        | 0.813          |
| PD-L1 expression by TIL and associated macrophages on TILS within tumor (%) | 0.931               | 0.762                          | 1.138        | 0.487          |
| CD8 density (cells/mm <sup>2</sup> ) within tumor                           | 0.918               | 0.813                          | 1.036        | 0.167          |
| CD8 density (cells/mm <sup>2</sup> ) at Invasive front                      | 0.986               | 0.502                          | 1.934        | 0.967          |
| CD8 density (cells/mm <sup>2</sup> ) in non-tumor tissue                    | 1.018               | 0.635                          | 1.631        | 0.941          |

\* except for PD-L1 Expression on Tumor ( $> 5\%$  vs.  $< 5\%$ ), which is represented as a binary variable



## V. REFERENCES

1. Bacher JW, Flanagan LA, Smalley RL, et al. Development of a fluorescent multiplex assay for detection of MSI-High tumors. *Disease markers* 2004;20:237-50.
2. Murphy KM, Zhang S, Geiger T, et al. Comparison of the microsatellite instability analysis system and the Bethesda panel for the determination of microsatellite instability in colorectal cancers. *The Journal of molecular diagnostics* : JMD 2006;8:305-11.
3. Jones S, Anagnostou V, Lytle K, et al. Personalized genomic analyses for cancer mutation discovery and interpretation. *Science translational medicine* 2015;7:283ra53.
4. Sausen M, Leary RJ, Jones S, et al. Integrated genomic analyses identify ARID1A and ARID1B alterations in the childhood cancer neuroblastoma. *Nature genetics* 2013;45:12-7.
5. Needleman SB, Wunsch CD. A general method applicable to the search for similarities in the amino acid sequence of two proteins. *Journal of molecular biology* 1970;48:443-53.
6. Lundegaard C, Lamberth K, Harndahl M, Buus S, Lund O, Nielsen M. NetMHC-3.0: accurate web accessible predictions of human, mouse and monkey MHC class I affinities for peptides of length 8-11. *Nucleic acids research* 2008;36:W509-12.
7. Buyse M, Michiels S, Sargent DJ, Grothey A, Matheson A, de Gramont A. Integrating biomarkers in clinical trials. *Expert review of molecular diagnostics* 2011;11:171-82.
8. Wolchok JD, Hoos A, O'Day S, et al. Guidelines for the evaluation of immune therapy activity in solid tumors: immune-related response criteria. *Clinical cancer research* : an official journal of the American Association for Cancer Research 2009;15:7412-20.
9. Llosa NJ, Cruise M, Tam A, et al. The vigorous immune microenvironment of microsatellite instable colon cancer is balanced by multiple counter-inhibitory checkpoints. *Cancer Discov* 2015:43-51.
10. Taube JM, Anders RA, Young GD, et al. Colocalization of Inflammatory Response with B7-H1 Expression in Human Melanocytic Lesions Supports an Adaptive Resistance Mechanism of Immune Escape. *Science Translational Medicine* 2012;4:127ra37.
11. Cuka N, Hempel H, Sfanos K, De Marzo A, Cornish T. PIP: An Open Source Framework for Multithreaded Image Analysis of Whole Slide Images. *LABORATORY INVESTIGATION* 2014;94:398A-A.
12. Cupitt J, Martinez K. VIPS: an image processing system for large images. *Electronic Imaging: Science & Technology*; 1996: International Society for Optics and Photonics. p. 19-28.

| Subject ID | Cohort | Tumor Type       | MSI Status | Germline mutations in MMR genes | Documented Lynch Syndrome | IHC                   | WHO/RECIST Response Rate | Radiographic Response (% change from baseline SLD) | Biochemical Response (% tumor marker change) | Patient HLA Haplotypes                               | HLA Haplotypes analyzed by for neoantigen prediction <sup>1</sup> | Total Somatic mutations | Mutations Resulting in an Amino Acid Change | Total Neoantigens | Total neoantigens per allele | Mutation-associated Neoantigens (MANAs) | MANA per allele | Membranous PD-L1 Expression on tumor cells [%] | PD-L1 Expression on TILs and Macrophages invasive front [%] | PD-L1 Expression on TILs [%] | CD8 density in tumor (mm2) | CD8 density at Invasive front (mm2) | CD8 density in non-tumor tissue (mm2) | Reason Off Study                                                     |                     |
|------------|--------|------------------|------------|---------------------------------|---------------------------|-----------------------|--------------------------|----------------------------------------------------|----------------------------------------------|------------------------------------------------------|-------------------------------------------------------------------|-------------------------|---------------------------------------------|-------------------|------------------------------|-----------------------------------------|-----------------|------------------------------------------------|-------------------------------------------------------------|------------------------------|----------------------------|-------------------------------------|---------------------------------------|----------------------------------------------------------------------|---------------------|
| 1          | A      | Colorectal       | MSI        | MSH2 (splice)                   | Yes                       | Unknown               | SD                       | 4                                                  | -79                                          | A*29:02, A*74:01, B*18:01, B*50:01, C*06:02, C*07:04 | 2 out of 4                                                        | 1291                    | 777                                         | 349               | 175                          | 120                                     | 60              | 0                                              | 40                                                          | 10                           | 227                        | 363                                 | 0                                     | Trousseau's Syndrome (unrelated)                                     |                     |
| 3          | B      | Colorectal       | MSS        | None                            | No                        | Unknown               | PD                       | 15                                                 | 586                                          | A*31:01, B*07:05, B*15:01, C*02:10, C*07:02          | Failed                                                            | -                       | -                                           | -                 | -                            | -                                       | 0               | 0                                              | 0                                                           | 23                           | 73                         | 0                                   | Disease Progression                   |                                                                      |                     |
| 4          | C      | Ampulla of Vater | MSI        | MSH2 (stop)                     | Yes                       | MSH2, MSH4            | PD                       | 56                                                 | 336                                          | A*02:01, A*26:01, B*35:01, B*38:01, C*04:01, C*12:03 | 4 out of 4                                                        | 771                     | 505                                         | 571               | 143                          | 233                                     | 58              | 5                                              | 5                                                           | 16                           | 209                        | 0                                   | Disease Progression                   |                                                                      |                     |
| 6          | C      | Small Bowel      | MSI        | MSH2 (stop)                     | Yes                       | MSH2, MSH4            | PD                       | 38                                                 | No Marker                                    | A*02:01, B*07:02, B*15:01, C*03:04, C*07:02          | 3 out of 3                                                        | 2138                    | 1575                                        | 2494              | 811                          | 791                                     | 264             | 0                                              | 0                                                           | 0                            | Failed                     | Failed                              | Failed                                | Disease Progression                                                  |                     |
| 7          | B      | Colorectal       | MSS        | None                            | No                        | Unknown               | PD                       | 35                                                 | 55                                           | A*11:01, A*24:02, B*07:02, C*07:02                   | 3 out of 3                                                        | 67                      | 59                                          | 52                | 17                           | 17                                      | 6               | Failed                                         | Failed                                                      | Failed                       | Failed                     | Failed                              | Failed                                | Disease Progression                                                  |                     |
| 8          | A      | Colorectal       | MSI        | None                            | No                        | MLH1                  | PR                       | -50                                                | -99                                          | A*11:01, A*33:01, B*14:02, C*06:02                   | 3 out of 3                                                        | 1681                    | 1016                                        | 1200              | 400                          | 322                                     | 107             | 0                                              | 0                                                           | 0                            | 5                          | 64                                  | 0                                     | N/A                                                                  |                     |
| 9          | A      | Colorectal       | MSI        | None                            | Yes                       | Unknown               | SD                       | 2                                                  | -17                                          | A*02:01, A*31:01, B*07:02, B*51:01, C*07:02, C*15:02 | 4 out of 4                                                        | 1814                    | 1222                                        | 2326              | 582                          | 626                                     | 157             | 0                                              | 75                                                          | 25                           | 91                         | 407                                 | 0                                     | Disease Progression                                                  |                     |
| 10         | B      | Colorectal       | MSS        | None                            | No                        | Unknown               | SD                       | 6                                                  | 74                                           | A*23:01, A*26:01, B*38:01, B*44:02, C*03:04, C*12:03 | 4 out of 4                                                        | 118                     | 105                                         | 68                | 17                           | 22                                      | 6               | 0                                              | 20                                                          | 20                           | 335                        | 227                                 | 0                                     | Asymptomatic grade 2 pancreatitis (grade 3 amylase/lipase) (related) |                     |
| 11         | A      | Colorectal       | MSI        | MSH2 (FS)                       | Yes                       | Unknown               | SD                       | -7                                                 | -94                                          | A*02:01, A*03:01, B*15:01, B*44:02, C*03:04, C*04:01 | 4 out of 4                                                        | 492                     | 328                                         | 533               | 133                          | 214                                     | 54              | 0                                              | 0                                                           | 0                            | 32                         | 282                                 | 0                                     | Disease Progression                                                  |                     |
| 13         | B      | Colorectal       | MSS        | None                            | No                        | Unknown               | PD                       | 45                                                 | 1939                                         | A*02:01, A*24:02, B*27:02, B*51:01, C*02:02          | 4 out of 4                                                        | 5                       | 5                                           | 10                | 3                            | 2                                       | 1               | Failed                                         | Failed                                                      | Failed                       | 0                          | 77                                  | 0                                     | Disease Progression                                                  |                     |
| 14         | B      | Colorectal       | MSS        | None                            | No                        | Unknown               | PD                       | 16                                                 | 478                                          | A*01:01, A*48:02, B*14:02, B*37:01, C*07:01, C*08:02 | Failed                                                            | -                       | -                                           | -                 | -                            | -                                       | Failed          | Failed                                         | Failed                                                      | Failed                       | Failed                     | Failed                              | Disease Progression                   |                                                                      |                     |
| 15         | A      | Colorectal       | MSI        | None                            | Yes                       | MSH2, MSH6            | PR                       | -35                                                | -97                                          | A*02:03, A*11:01, B*15:01, B*18:01, C*04:01, C*07:04 | 4 out of 4                                                        | 2345                    | 1476                                        | 3506              | 877                          | 1029                                    | 257             | 10                                             | 15                                                          | 20                           | 162                        | 72                                  | 0                                     | N/A                                                                  |                     |
| 16         | A      | Colon/Duodenal   | MSI        | MLH1 (FS)                       | Yes                       | Unknown               | SD                       | -28                                                | -94                                          | A*03:01, A*11:01, B*15:18, B*35:01, C*04:01, C*07:04 | 4 out of 4                                                        | 4025                    | 2287                                        | 3928              | 982                          | 1221                                    | 305             | 10                                             | 75                                                          | 5                            | 298                        | 673                                 | 0                                     | N/A                                                                  |                     |
| 17         | B      | Colorectal       | MSS        | None                            | No                        | Unknown               | PD                       | 40                                                 | 65                                           | A*01:01, A*30:01, B*08:01, B*13:02, C*06:02, C*07:01 | 3 out of 4                                                        | 70                      | 65                                          | 69                | 23                           | 22                                      | 7               | 0                                              | 5                                                           | 10                           | Failed                     | Failed                              | Failed                                | Disease Progression                                                  |                     |
| 18         | B      | Colorectal       | MSS        | None                            | No                        | None                  | PD                       | 5                                                  | -7                                           | A*02:01, A*68:01, B*44:02, C*05:01                   | Failed                                                            | -                       | -                                           | -                 | -                            | -                                       | 0               | 5                                              | 5                                                           | 144                          | 343                        | 0                                   | Disease Progression                   |                                                                      |                     |
| 19         | A      | Colorectal       | MSI        | None                            | No                        | MLH1, PMS2            | PR                       | -35                                                | -75                                          | A*01:01, A*31:01, B*08:01, B*35:01, C*04:01, C*07:01 | 4 out of 4                                                        | 1477                    | 770                                         | 1011              | 253                          | 654                                     | 164             | 10                                             | 40                                                          | 10                           | 1009                       | 582                                 | Failed                                | N/A                                                                  |                     |
| 20         | C      | Ampulla of Vater | MSI        | MSH2                            | Yes                       | MSH2, MSH6            | PR                       | -73                                                | -96                                          | Not Done                                             | Not Done                                                          | -                       | -                                           | -                 | -                            | -                                       | -               | -                                              | -                                                           | -                            | -                          | -                                   | -                                     | N/A                                                                  |                     |
| 21         | B      | Colorectal       | MSS        | None                            | No                        | Unknown               | PD                       | 34                                                 | 60                                           | A*01:01, A*02:01, B*51:01, B*55:01, C*03:03, C*14:02 | 3 out of 4                                                        | 77                      | 72                                          | 59                | 20                           | 20                                      | 7               | 0                                              | 1                                                           | 0                            | 38                         | 308                                 | 0                                     | Disease Progression                                                  |                     |
| 22         | B      | Colorectal       | MSS        | None                            | No                        | Unknown               | SD                       | -14                                                | -12                                          | A*23:01, A*68:01, B*35:01, B*40:01, C*03:04, C*04:01 | 3 out of 4                                                        | 102                     | 96                                          | 160               | 40                           | 45                                      | 11              | Failed                                         | Failed                                                      | Failed                       | Failed                     | Failed                              | Failed                                | Disease Progression                                                  |                     |
| 24         | B      | Colorectal       | MSS        | None                            | No                        | None                  | Clinical PD              | 2                                                  | No Marker                                    | Not Done                                             | Not Done                                                          | -                       | -                                           | -                 | -                            | -                                       | -               | -                                              | -                                                           | -                            | -                          | -                                   | -                                     | Disease Progression                                                  |                     |
| 25         | C      | Duodenum         | MSI        | None                            | No                        | PMS2, MLH1            | PR                       | -50                                                | No Marker                                    | A*03:01, A*25:01, B*07:02, B*18:01, C*07:02, C*12:03 | Not Done                                                          | -                       | -                                           | -                 | -                            | -                                       | -               | 0                                              | Failed                                                      | 10                           | 623                        | Failed                              | Failed                                | N/A                                                                  |                     |
| 26         | B      | Colorectal       | MSS        | None                            | No                        | Unknown               | Clinical PD              | -11                                                | -4                                           | A*11:01, A*24:02, B*18:01, B*57:01, C*06:02, C*07:02 | Not Done                                                          | -                       | -                                           | -                 | -                            | -                                       | 0               | 0                                              | 0                                                           | Failed                       | Failed                     | Failed                              | Failed                                | Disease Progression                                                  |                     |
| 27         | B      | Colorectal       | MSS        | None                            | No                        | Unknown               | Clinical PD              | 11                                                 | 11                                           | A*01:02, A*24:02, B*07:02, B*58:02, C*06:02, C*07:02 | Not Done                                                          | -                       | -                                           | -                 | -                            | -                                       | 1               | 0                                              | 0                                                           | 71                           | 194                        | 0                                   | Failed                                | Disease Progression                                                  |                     |
| 28         | B      | Colorectal       | MSS        | None                            | No                        | None                  | PD                       | -9                                                 | -9                                           | A*03:01, B*07:02, B*14:02, C*07:02, C*08:02          | Not Done                                                          | -                       | -                                           | -                 | -                            | -                                       | 0               | 0                                              | 0                                                           | 114                          | 259                        | 0                                   | Failed                                | N/A                                                                  |                     |
| 29         | C      | Endometrium      | MSI        | None                            | No                        | MLH1, PMS2            | CR                       | -61                                                | -93                                          | A*01:01, A*03:01, B*07:02, B*37:01, C*06:02, C*07:02 | Not Done                                                          | -                       | -                                           | -                 | -                            | -                                       | 1               | Failed                                         | 5                                                           | 870                          | Failed                     | Failed                              | Failed                                | N/A                                                                  |                     |
| 30         | C      | Endometrium      | MSI        | None                            | No                        | MSH2, MSH6            | PR                       | -70                                                | -13                                          | A*24:02, A*26:01, B*35:02, C*04:01                   | Not Done                                                          | -                       | -                                           | -                 | -                            | -                                       | 0               | 70                                             | 30                                                          | 347                          | 1215                       | 0                                   | Failed                                | N/A                                                                  |                     |
| 31         | A      | Colorectal       | MSI        | MLH1                            | Yes                       | MSH2, MSH6, weak MLH1 | PR                       | -51                                                | No Marker                                    | A*11:01, A*24:02, B*35:02, B*52:01, C*04:01, C*12:02 | Not Done                                                          | -                       | -                                           | -                 | -                            | -                                       | 0               | 0                                              | 0                                                           | 7                            | 13                         | Failed                              | Failed                                | N/A                                                                  |                     |
| 32         | B      | Colorectal       | MSS        | None                            | No                        | None                  | PD                       | 16                                                 | No Marker                                    | A*01:01, A*02:01, B*44:02, B*57:01, C*05:01, C*06:02 | Not Done                                                          | -                       | -                                           | -                 | -                            | -                                       | 0               | 10                                             | 5                                                           | 72                           | 146                        | 0                                   | Failed                                | Disease Progression                                                  |                     |
| 33         | A      | Colorectal       | MSI        | MSH2                            | Yes                       | MSH2, MSH6            | PD                       | 7                                                  | 28                                           | A*02:01, A*26:01, B*13:02, B*27:05, C*02:02, C*06:02 | Not Done                                                          | -                       | -                                           | -                 | -                            | -                                       | 0               | 0                                              | 5                                                           | 32                           | 891                        | 0                                   | Failed                                | N/A                                                                  |                     |
| 35         | C      | Bile duct        | MSI        | None                            | No                        | MLH1, PMS2            | PR                       | -41                                                | -93                                          | Not Done                                             | Not Done                                                          | -                       | -                                           | -                 | -                            | -                                       | -               | -                                              | -                                                           | -                            | -                          | -                                   | -                                     | Failed                                                               | N/A                 |
| 36         | A      | Colorectal       | MSI        | MLH1                            | Yes                       | MLH1                  | SD                       | 3                                                  | 64                                           | A*02:01, A*29:02, B*44:02, B*44:03, C*02:02, C*16:01 | Not Done                                                          | -                       | -                                           | -                 | -                            | -                                       | 0               | 5                                              | 5                                                           | 205                          | 1192                       | 0                                   | Failed                                | N/A                                                                  |                     |
| 37         | B      | Colorectal       | MSS        | None                            | No                        | Unknown               | PD                       | 26                                                 | -20                                          | Not Done                                             | Not Done                                                          | -                       | -                                           | -                 | -                            | -                                       | -               | -                                              | -                                                           | -                            | -                          | -                                   | -                                     | Failed                                                               | Disease Progression |
| 28         | B      | Colorectal       | MSS        | None                            | No                        | Unknown               | Clinical PD              | 2                                                  | 17                                           | A*01:01, A*02:01, B*08:01, B*44:02, C*05:01, C*07:01 | Not Done                                                          | -                       | -                                           | -                 | -                            | -                                       | 0               | 0                                              | 0                                                           | 127                          | 462                        | 0                                   | Failed                                | Disease Progression                                                  |                     |
| 40         | B      | Colorectal       | MSS        | None                            | No                        | Unknown               | Not evaluable            | -                                                  | -37                                          | A*01:01, A*26:01, B*07:02, B*44:02, C*05:01, C*07:02 | Not Done                                                          | -                       | -                                           | -                 | -                            | -                                       | 0               | 5                                              | 10                                                          | 50                           | 27                         | 0                                   | Failed                                | N/A                                                                  |                     |
| 41         | B      | Colorectal       | MSS        | None                            | No                        | Unknown               | Clinical PD              | -4                                                 | No Marker                                    | Not Done                                             | Not Done                                                          | -                       | -                                           | -                 | -                            | -                                       | -               | -                                              | -                                                           | -                            | -                          | -                                   | -                                     | Failed                                                               | Disease Progression |
| 42         | A      | Colorectal       | MSI        | Pending                         | Yes                       | Unknown               | Not evaluable            | -                                                  | -95                                          | Not Done                                             | Not Done                                                          | -                       | -                                           | -                 | -                            | -                                       | -               | -                                              | -                                                           | -                            | -                          | -                                   | -                                     | Failed                                                               | N/A                 |
| 44         | C      | Ampulla of Vater | MSI        | Pending                         | Yes                       | MSH6                  | Not evaluable            | -                                                  | No Marker                                    | Not Done                                             | Not Done                                                          | -                       | -                                           | -                 | -                            | -                                       | -               | -                                              | -                                                           | -                            | -                          | -                                   | -                                     | Failed                                                               | Disease Progression |
| 2.001      | B      | Colorectal       | MSS        | None                            | No                        | None                  | PD                       | 306                                                | No Marker                                    | Not Done                                             | Not Done                                                          | -                       | -                                           | -                 | -                            | -                                       | -               | -                                              | -                                                           | -                            | -                          | -                                   | -                                     | Failed                                                               | Disease Progression |
| 2.002      | B      | Colorectal       | MSS        | None                            | No                        | None                  | Not evaluable            | 209                                                | No Marker                                    | Not Done                                             | Not Done                                                          | -                       | -                                           | -                 | -                            | -                                       | -               | -                                              | -                                                           | -                            | -                          | -                                   | -                                     | Failed                                                               | N/A                 |
| 2.003      | B      | Colorectal       | MSS        | None                            | No                        | None                  | Not evaluable            | 46                                                 | No Marker                                    | Not Done                                             | Not Done                                                          | -                       | -                                           | -                 | -                            | -                                       | -               | -                                              | -                                                           | -                            | -                          | -                                   | -                                     | Failed                                                               | N/A                 |
| 2.004      | C      | Gastric          | MSI        | Pending                         | Unknown                   | MLH1, PMS2            | Not evaluable            | -                                                  | No Marker                                    | Not Done                                             | Not Done                                                          | -                       | -                                           | -                 | -                            | -                                       | -               | -                                              | -                                                           | -                            | -                          | -                                   | -                                     | Failed                                                               | N/A                 |

<sup>1</sup>Only HLA A and B were used for neoantigen prediction

<sup>2</sup>5% or greater indicates significant PD-L1 expression on tumor cells

1-013REL 1-003LEW 1-014JTO 1-004AJG 2.001 J-D 2.002 TAS 1-010S-V 1-017RW 1-021KB  
 1939.444 586.286 478.373 335.611 305.833 209.357 73.8983 65.2174 60.1533

|           |      |     |       |
|-----------|------|-----|-------|
| 1-001SLT  | -79  | 1   | 1     |
| 1-003LEW  | 586  | 3   | 3     |
| 1-004AJG  | 336  | 4   | 4     |
|           |      |     | 6     |
| 1-007JJC  | 55   | 7   | 7     |
| 1-008E-O  | -99  | 8   | 8     |
| 1-009T-W  | -17  | 9   | 9     |
| 1-010S-V  | 74   | 10  | 10    |
| 1-011KW   | -94  | 11  | 11    |
| 1-013REL  | 1939 | 13  | 13    |
| 1-014JTO  | 478  | 14  | 14    |
| 1-015 PT  | -97  | 15  | 15    |
| 1-016MEC  | -94  | 16  | 16    |
| 1-017RW   | 65   | 17  | 17    |
| 1-018CP   | -7   | 18  | 18    |
| 1-019MD   | -75  | 19  | 19    |
| 1-020 AS  | -96  | 20  | 20    |
| 1-021KB   | 60   | 21  | 21    |
| 1-022ACC  | -12  | 22  | 22    |
|           |      |     | 24    |
|           |      |     | 25    |
| 1-026ALT  | -4   | 26  | 26    |
| 1-027ASE  | 11   | 27  | 27    |
| 1-028MM   | -9   | 28  | 28    |
| 1-029LAL  | -93  | 29  | 29    |
| 1-032LRS  | -13  | 32  | 30    |
|           |      |     | 31    |
|           |      |     | 32    |
| 1-033TC   | 28   | 33  | 33    |
| 1-035DJB  | -93  | 35  | 35    |
| 1-036DL   | -64  | 36  | 36    |
| 1-037PH   | -20  | 37  | 37    |
| 1-038DCF  | 17   | 38  | 38    |
| 1-040-RH  | -37  | 40  | 40    |
|           |      |     | 41    |
| 1-042YG   | -95  | 42  | 42    |
|           |      |     | 44    |
| 2.001 J-D | 306  | 2.1 | 2.001 |
| 2.002 TAS | 209  | 2.2 | 2.002 |
| 2.003 Y-F | 46   | 2.3 | 2.003 |

2.004

1-007JJC 2.003 Y-F 1-033TC 1-038DCF 1-027ASE 1-026ALT 1-018CP 1-028MM 1-022ACC  
54.8936 45.946 28.2609 16.8398 11.0816 -4.49161 -6.85714 -8.57143 -11.8012



1-032LRS 1-009T-W 1-037PH 1-040-RH 1-036DL 1-019MD 1-001SLT 1-035DJB 1-029LAL  
-12.6404 -16.9492 -20 -36.5217 -63.6364 -74.5098 -78.8918 -92.6535 -92.7083





1-011KW 1-016MEC 1-042YG 1-020 AS 1-015 PT 1-008E-O  
-93.5294 -94.382 -95.339 -96.3223 -96.9795 -98.8599
